# Supplementary material for: Contemporary Prevalence of Oral Clefts in the US: Geographic and Socioeconomic Considerations
Source: MDPI journal article supplement (doi:10.3390/jcm13092570), 2024-04-27
Supplement: s1 [file s1]

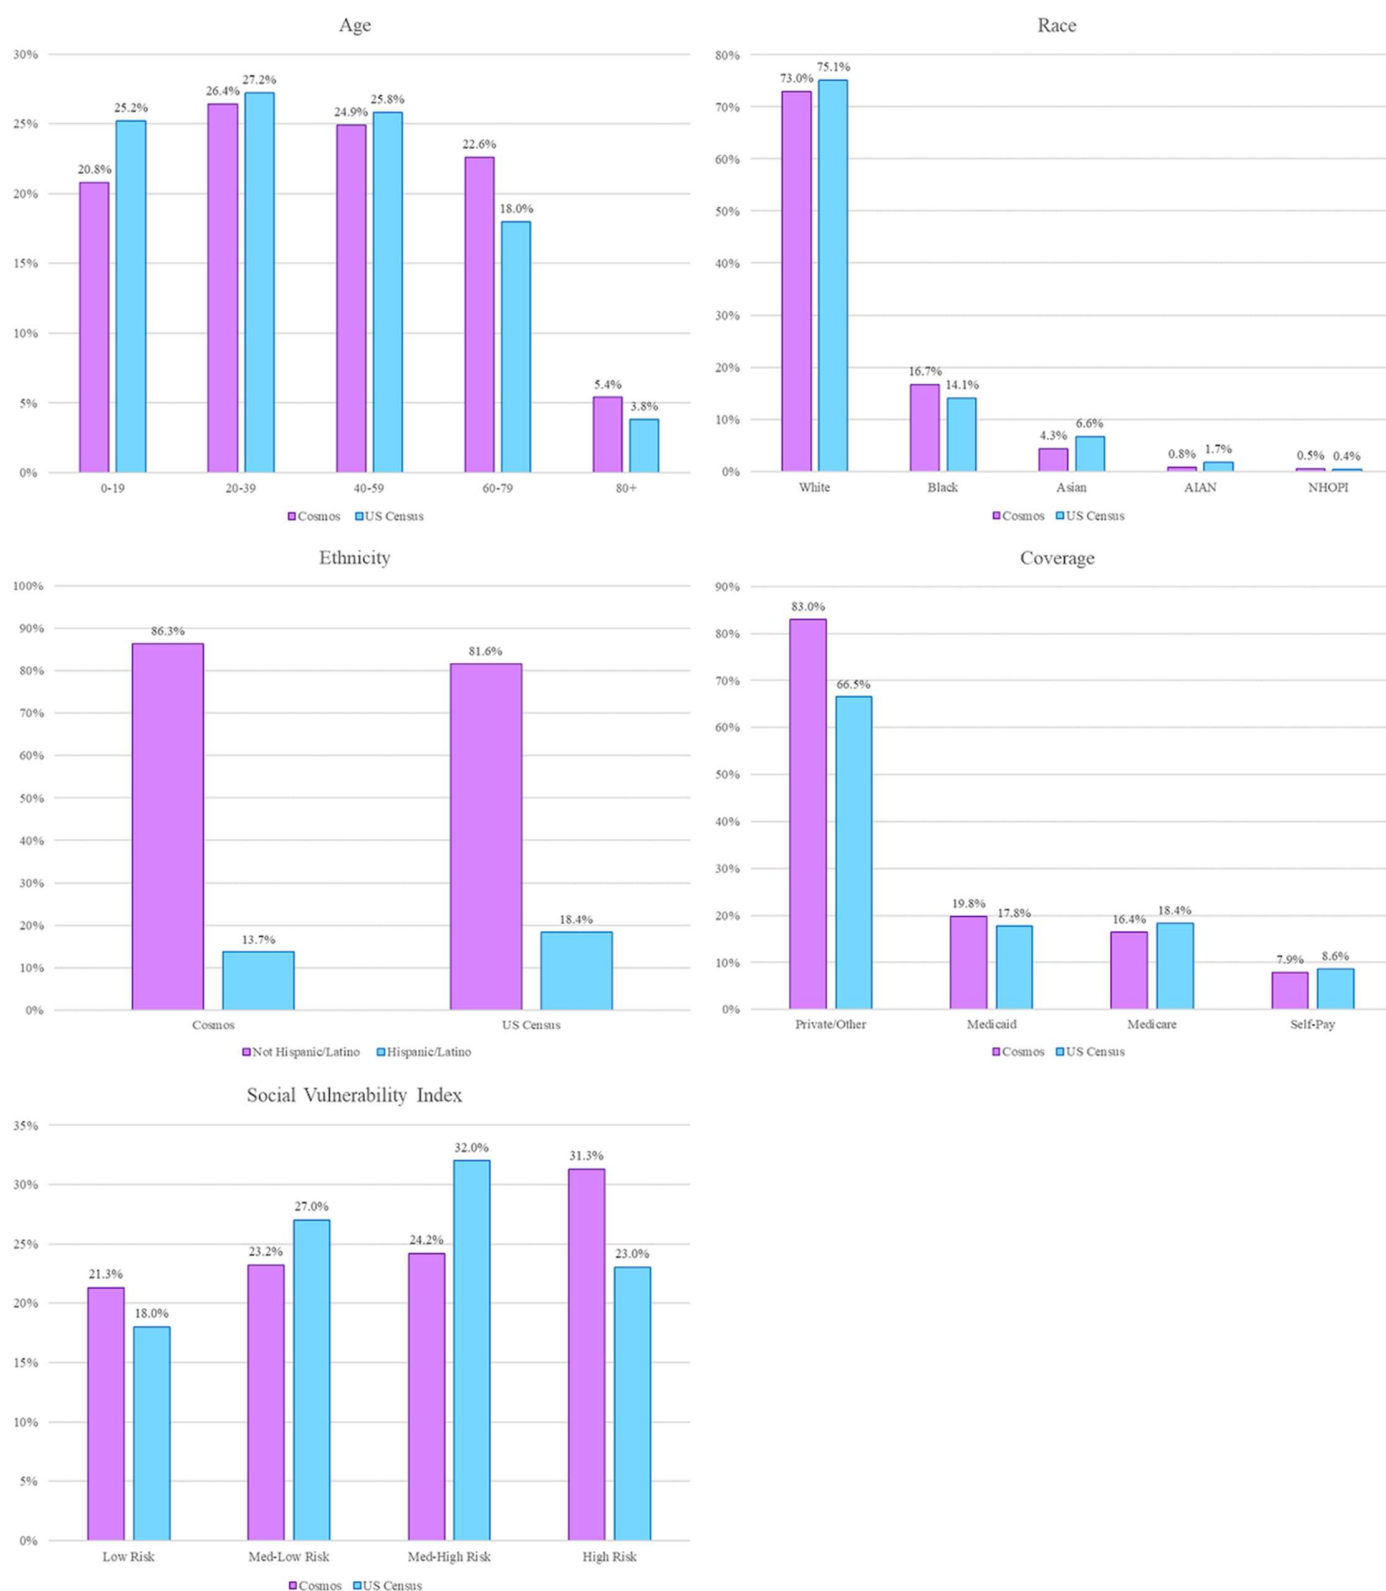

**Supplemental Figure S1.** Comparison of demographic, insurance, and social vulnerability between COSMOS patients and the US Census. Adapted from <https://Cosmos.epic.com/>.

|                                               |                                                                                                          |
|-----------------------------------------------|----------------------------------------------------------------------------------------------------------|
| <b>Socioeconomic status</b>                   | Below poverty<br>Unemployed<br>Income<br>No high school diploma                                          |
| <b>Household composition &amp; disability</b> | Aged 65 or older<br>Aged 17 or younger<br>Older than age 5 with a disability<br>Single-parent households |
| <b>Minority status &amp; language</b>         | Minority<br>Speaks English “less than well”                                                              |
| <b>Housing type &amp; transportation</b>      | Multi-unit structures<br>Mobile homes<br>Crowding<br>No vehicle<br>Group quarters                        |

Supplemental Figure S2. SVI sub-groups.

Supplemental Table S1. ICD-10-CM codes are used to identify Oral Cleft Cohorts.

| <b>Cohort</b>               | <b>ICD-10-CM</b>      |                 |
|-----------------------------|-----------------------|-----------------|
|                             | <b>Included</b>       | <b>Excluded</b> |
| Any Oral Cleft (AOC)        | Q35.* + Q36.* + Q37.* | -               |
| Any Cleft Palate (ACP)      | Q35.*+ Q37.*          | -               |
| Isolated Cleft Palate (ICP) | Q35.*                 | Q36.* + Q37.*   |
| Any Cleft Lip (ACL)         | Q36.* + Q37.*         | -               |
| Isolated Cleft Lip (ICL)    | Q36.*                 | Q35.*+ Q37.*    |
| Cleft Lip and Palate (CLP)  | Q37.*                 | -               |

Supplemental Table S2. 4 main SVI categories divided by subgroup

|                                               |                                                                                                          |
|-----------------------------------------------|----------------------------------------------------------------------------------------------------------|
| <b>Socioeconomic status</b>                   | Below poverty<br>Unemployed<br>Income<br>No high school diploma                                          |
| <b>Household composition &amp; disability</b> | Aged 65 or older<br>Aged 17 or younger<br>Older than age 5 with a disability<br>Single-parent households |
| <b>Minority status &amp; language</b>         | Minority<br>Speaks English “less than well”                                                              |
| <b>Housing type &amp; transportation</b>      | Multi-unit structures<br>Mobile homes<br>Crowding<br>No vehicle<br>Group quarters                        |
